# Supplementary material
Source: PubMed Central journal article supplement (PMC2821710)
Supplement: NIHMS167921-supplement-1_si_001.pdf [file NIHMS167921-supplement-1_si_001.pdf]

**SCHEME S1: (*S,R*)-2-(Methylsulfinylmethyl)thiirane<sup>a</sup>**

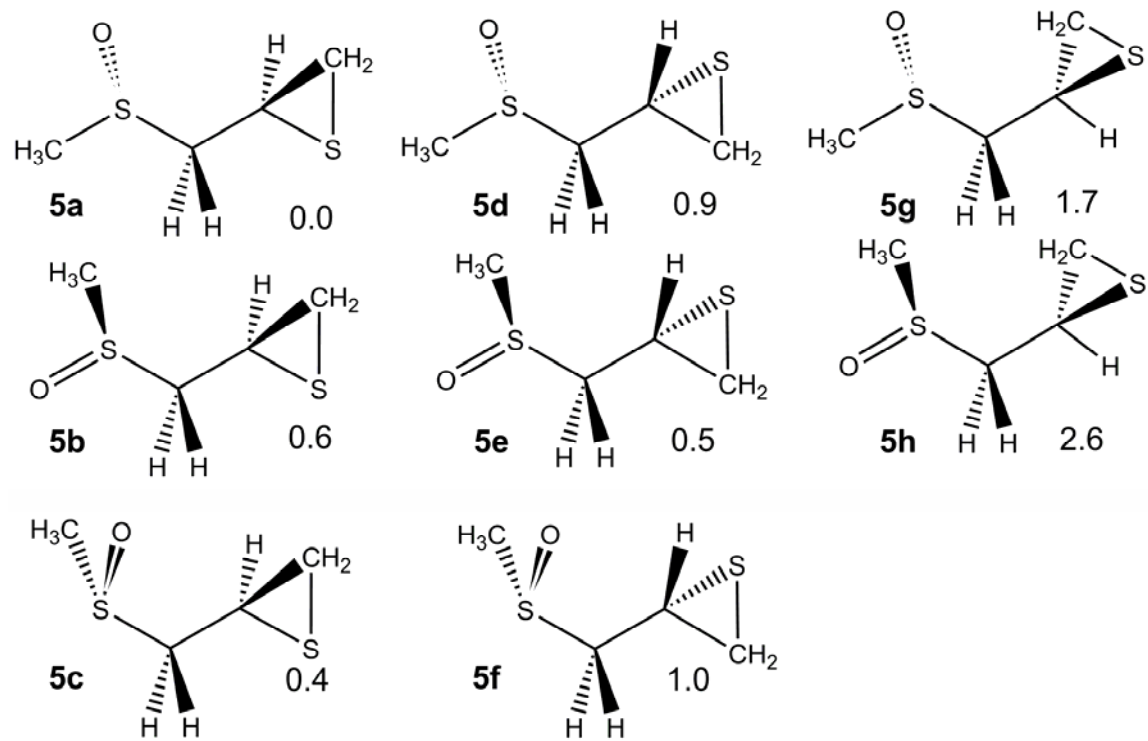

<sup>a</sup> Relative energies in kcal/mol.

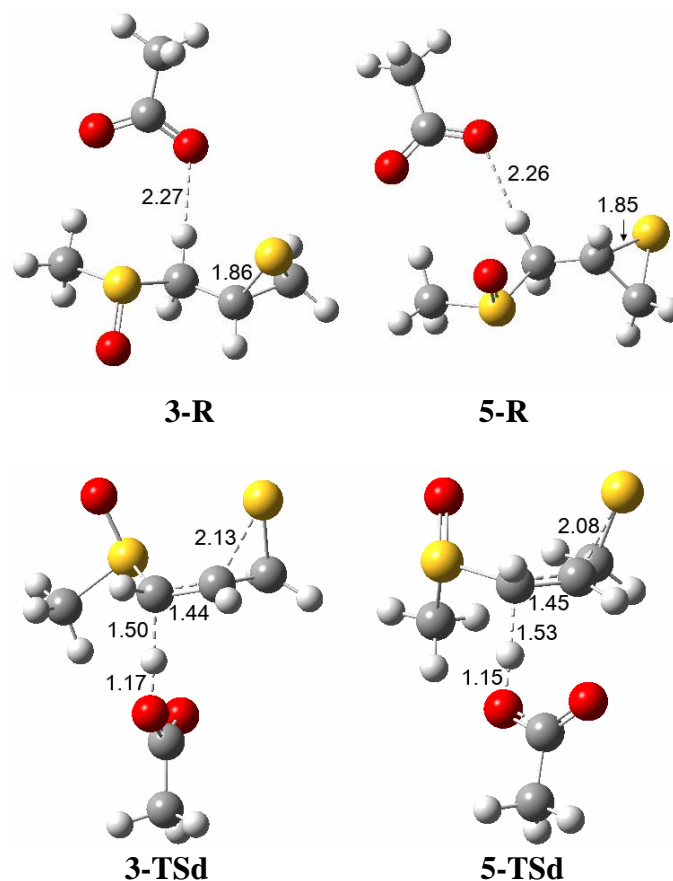

**Figure S1.** Reactant complexes (**3-R**, **5-R**) and TS complexes (**3-TSd**, **5-TSd**) of 2-(methylsulfinylmethyl)thiirane and acetate optimized at the IEF-PCM/B3LYP/6-31+G(d) level of theory in methanol. Distances are in Å. Atoms are colored according to atom types (H, C, O, and S shown in white, grey, red, and yellow, respectively). The same color scheme is also used in Figure S2 and S3.

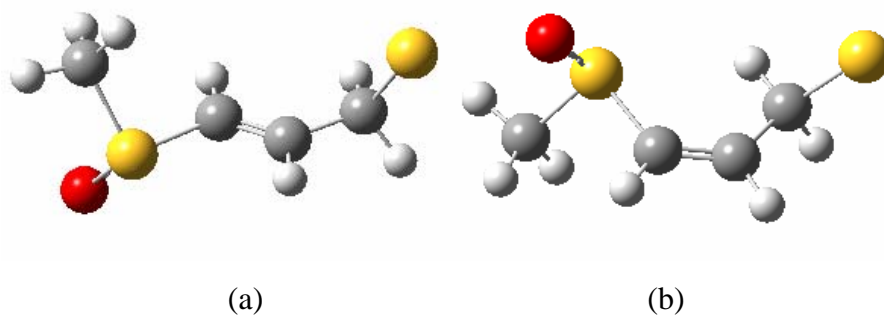

**Figure S2.** Ring-opening products of **3** optimized at the IEF-PCM/B3LYP/6-31+G(d) level of theory in methanol. (a). (*E*)-3-(methylsulfinyl)prop-2-ene-1-thiolate, (b) (*Z*)-3-(methylsulfinyl)prop-2-ene-1-thiolate.

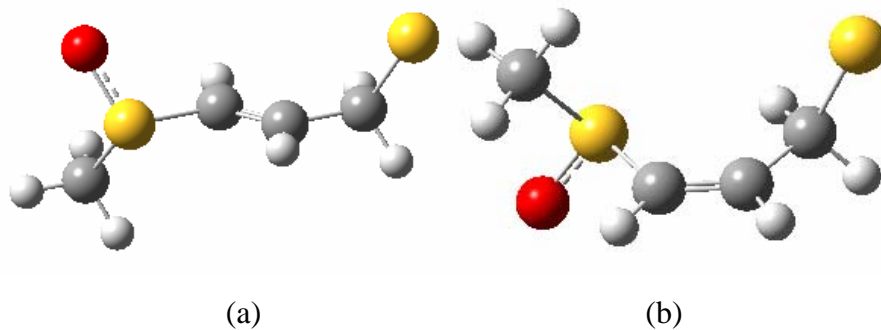

**Figure S3.** Ring-opening products of **5** optimized at the IEF-PCM/B3LYP/6-31+G(d) level of theory in methanol. (a). (*E*)-3-(methylsulfinyl)prop-2-ene-1-thiolate, (b) (*Z*)-3-(methylsulfinyl)prop-2-ene-1-thiolate.

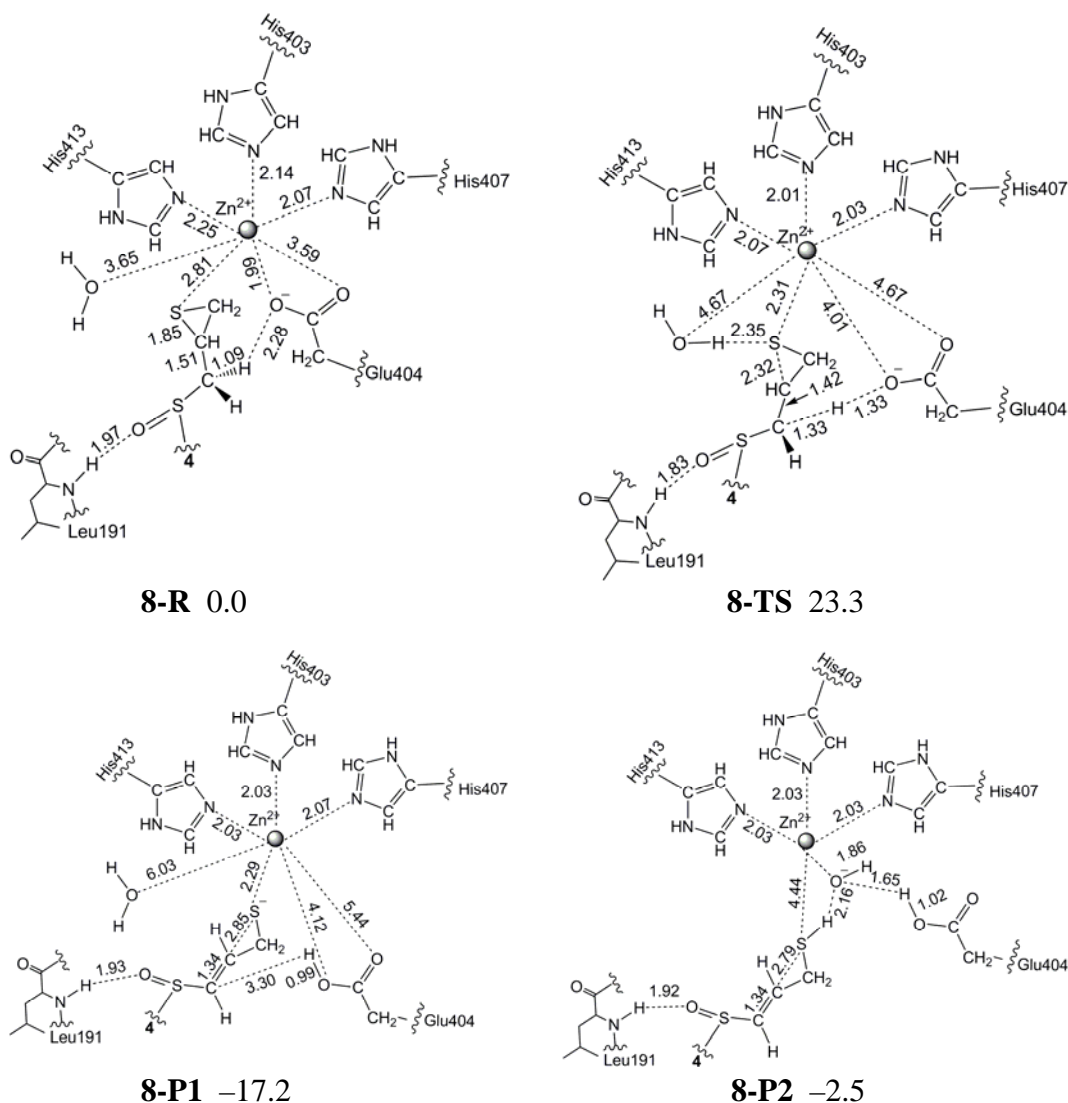

**Figure S4.** Reactant, transition state and products for the (*R,R*) sulfoxide analogue of SB-3CT (**4**) in the MMP2 active site (**8**) optimized at the ONIOM(B3LYP/6-31G(d):AMBER) level of theory. Energies (in kcal/mol) were calculated at ONIOM(B3LYP/6-311+G(d,p):AMBER) using electronic embedding with the reactant complex used as reference state. The sulfoxide group of **4** forms hydrogen bond with the backbone NH of Leu191. Complex **8-P1** is the unprotonated ring-opening product. In complex **8-P2**, the ring-opening product thiolate is protonated by a water molecule, and the resulting hydroxide anion coordinates with the zinc. Key bond lengths are in Å. Ball-and-stick representation of QM region and cartoon representation of protein are shown in Figure 2.



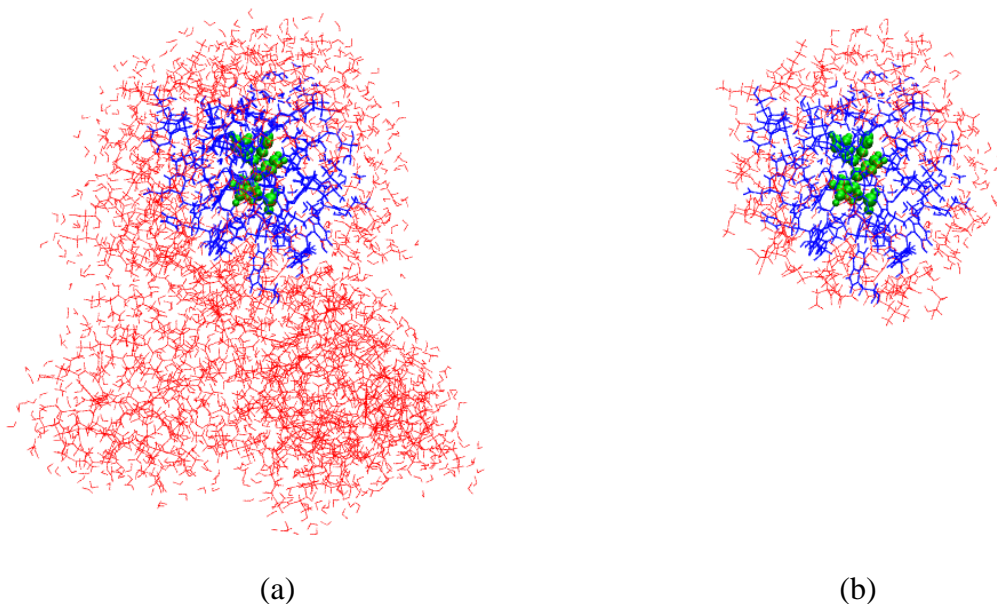

**Figure S6.** Illustration of full and partial QM/MM models. (a) full size QM/MM model, (b) partial QM/MM model. The QM region is shown in green. Residues allowed to move during optimization are in blue. Frozen residues are in red. Partial models were built for both **8-TS** and **9-TS** and subject to full vibrational frequency and IRC calculations. The animations available: vibrational normal mode and IRC path of **8-TS** and vibrational normal mode and IRC path of **9-TS**.

Cartesian coordinates of conformers for **3**:

**3a**

|   |           |           |           |
|---|-----------|-----------|-----------|
| C | -1.118244 | -0.033828 | 0.555534  |
| H | -1.137279 | 0.012683  | 1.642811  |
| C | -1.772674 | 1.081787  | -0.164773 |
| H | -2.193613 | 1.897027  | 0.417540  |
| H | -1.377802 | 1.366310  | -1.136409 |
| C | 0.086341  | -0.730016 | -0.027813 |
| H | 0.186452  | -1.745841 | 0.368156  |
| H | 0.047873  | -0.762802 | -1.121562 |
| C | 2.802973  | -0.989125 | -0.370941 |
| H | 2.551048  | -1.077815 | -1.431458 |
| H | 3.803856  | -0.567498 | -0.252942 |
| H | 2.748775  | -1.960461 | 0.128915  |
| S | 1.644631  | 0.168560  | 0.441248  |
| O | 1.671313  | 1.467141  | -0.380090 |
| S | -2.769018 | -0.473037 | -0.161647 |

**3b**

|   |           |           |           |
|---|-----------|-----------|-----------|
| C | 1.067754  | 0.437857  | -0.098438 |
| H | 0.948937  | 1.481576  | -0.379385 |
| C | 1.841180  | 0.176167  | 1.138792  |
| H | 2.192703  | 1.025853  | 1.717818  |
| H | 1.593468  | -0.706520 | 1.723947  |
| C | -0.058238 | -0.478181 | -0.509762 |
| H | -0.294821 | -0.397835 | -1.575630 |
| H | 0.174653  | -1.520888 | -0.275235 |
| C | -2.077283 | 1.446281  | -0.337322 |
| H | -2.105634 | 1.343884  | -1.425780 |
| H | -3.065688 | 1.713261  | 0.044369  |
| H | -1.351984 | 2.205874  | -0.032162 |
| S | -1.643319 | -0.159623 | 0.417010  |
| O | -2.644331 | -1.180474 | -0.148822 |
| S | 2.794727  | -0.165012 | -0.402447 |



**3c**

|   |           |           |           |
|---|-----------|-----------|-----------|
| C | -0.907027 | -0.188609 | 0.337602  |
| H | -0.655855 | -0.594591 | 1.314903  |
| C | -1.612314 | 1.113821  | 0.320167  |
| H | -1.801194 | 1.614153  | 1.266508  |
| H | -1.448455 | 1.778663  | -0.524421 |
| C | 0.041865  | -0.582536 | -0.766355 |
| H | -0.002807 | -1.658426 | -0.960281 |
| H | -0.160656 | -0.052728 | -1.703101 |
| C | 1.803380  | 1.500126  | -0.049160 |
| H | 1.146584  | 1.722027  | 0.795132  |
| H | 2.829595  | 1.789391  | 0.189324  |
| H | 1.474206  | 2.020174  | -0.953309 |
| S | 1.836743  | -0.300650 | -0.363513 |
| O | 2.096440  | -0.971208 | 0.995746  |
| S | -2.718516 | -0.318463 | -0.039253 |

**3d**

|   |           |           |           |
|---|-----------|-----------|-----------|
| C | -1.140102 | 0.074134  | 0.666138  |
| H | -1.023395 | -0.672930 | 1.447956  |
| C | -2.443863 | 0.775923  | 0.615721  |
| H | -3.185150 | 0.537643  | 1.373874  |
| H | -2.461877 | 1.804877  | 0.264289  |
| C | 0.124336  | 0.816460  | 0.312069  |
| H | -0.050045 | 1.555191  | -0.476694 |
| H | 0.532680  | 1.312096  | 1.201963  |
| C | 2.760959  | 0.891778  | -0.474250 |
| H | 2.925009  | 1.395431  | 0.482459  |
| H | 3.658856  | 0.346142  | -0.773517 |
| H | 2.487469  | 1.608440  | -1.254158 |
| S | 1.427065  | -0.344277 | -0.300072 |
| O | 1.802814  | -1.233774 | 0.896565  |
| S | -2.246693 | -0.491127 | -0.709726 |

**3e**

|   |           |           |           |
|---|-----------|-----------|-----------|
| C | -1.142711 | -0.655995 | -0.418742 |
| H | -1.093821 | -0.855895 | -1.487516 |
| C | -2.433241 | -0.972856 | 0.239685  |
| H | -3.220358 | -1.418983 | -0.362569 |
| H | -2.415082 | -1.291398 | 1.279281  |
| C | 0.145395  | -0.904156 | 0.329808  |
| H | 0.085894  | -0.614571 | 1.383627  |
| H | 0.396683  | -1.970296 | 0.269125  |
| C | 1.434537  | 1.585511  | 0.261137  |
| H | 1.408429  | 1.531277  | 1.353054  |
| H | 2.301791  | 2.161406  | -0.070703 |
| H | 0.518413  | 2.034743  | -0.130017 |
| S | 1.631853  | -0.094038 | -0.425238 |
| O | 2.838417  | -0.710659 | 0.303000  |
| S | -2.176425 | 0.831161  | -0.020363 |

**3f**

|   |           |           |           |
|---|-----------|-----------|-----------|
| C | 0.970710  | -0.658258 | 0.236085  |
| H | 0.679222  | -0.996003 | 1.227562  |
| C | 2.382399  | -0.935641 | -0.138942 |
| H | 2.999414  | -1.483493 | 0.568575  |
| H | 2.607973  | -1.126562 | -1.185696 |
| C | -0.097543 | -0.750219 | -0.824175 |
| H | 0.253537  | -0.332084 | -1.772389 |
| H | -0.382357 | -1.796743 | -0.994943 |
| C | -2.231757 | -0.811433 | 0.992848  |
| H | -1.516681 | -0.672738 | 1.807486  |
| H | -3.203268 | -0.402854 | 1.280853  |
| H | -2.338035 | -1.869030 | 0.735514  |
| S | -1.701284 | 0.125204  | -0.485557 |
| O | -1.393153 | 1.549231  | -0.002232 |
| S | 2.070194  | 0.825981  | 0.282807  |

**3g**

|   |           |           |           |
|---|-----------|-----------|-----------|
| C | 1.284430  | -0.756525 | 0.619375  |
| H | 1.826569  | -1.184318 | 1.461037  |
| C | 1.901221  | -0.958349 | -0.711508 |
| H | 2.811537  | -1.548785 | -0.774424 |
| H | 1.250401  | -1.028602 | -1.580362 |
| C | -0.215174 | -0.795047 | 0.833999  |
| H | -0.558470 | -1.832840 | 0.752096  |
| H | -0.486940 | -0.409548 | 1.822311  |
| C | -2.746150 | -0.735771 | -0.228039 |
| H | -3.038789 | -0.819764 | 0.822422  |
| H | -3.504958 | -0.185232 | -0.788747 |
| H | -2.598184 | -1.723287 | -0.674478 |
| S | -1.196805 | 0.225911  | -0.365995 |
| O | -1.477509 | 1.571729  | 0.321252  |
| S | 2.120114  | 0.751132  | -0.052307 |

**3h**

|   |           |           |           |
|---|-----------|-----------|-----------|
| C | -1.267835 | -0.944537 | 0.300507  |
| H | -1.788915 | -1.891209 | 0.175677  |
| C | -2.036588 | 0.107159  | 1.005220  |
| H | -3.015986 | -0.153645 | 1.397974  |
| H | -1.496608 | 0.844745  | 1.594070  |
| C | 0.232296  | -1.130030 | 0.462500  |
| H | 0.529249  | -1.108788 | 1.517398  |
| H | 0.527594  | -2.097547 | 0.047126  |
| C | 1.241921  | 1.501471  | 0.630417  |
| H | 2.006259  | 2.199747  | 0.280292  |
| H | 0.253701  | 1.952057  | 0.513774  |
| H | 1.436835  | 1.220573  | 1.669053  |
| S | 1.370555  | 0.027694  | -0.442714 |
| O | 2.771418  | -0.550923 | -0.176149 |
| S | -1.973195 | 0.362123  | -0.818413 |

**3i**

|   |           |           |           |
|---|-----------|-----------|-----------|
| C | 1.228847  | -0.536397 | 0.766244  |
| H | 1.897570  | -0.799884 | 1.585871  |
| C | 1.694815  | -0.944122 | -0.580109 |
| H | 2.618651  | -1.512791 | -0.650216 |
| H | 0.941409  | -1.157179 | -1.331433 |
| C | -0.211430 | -0.616794 | 1.239154  |
| H | -0.386582 | -1.650199 | 1.564327  |
| H | -0.372786 | 0.026145  | 2.111452  |
| C | -1.596306 | 1.546814  | 0.026036  |
| H | -0.659454 | 1.871245  | -0.428384 |
| H | -2.451248 | 1.841687  | -0.587633 |
| H | -1.709543 | 1.955486  | 1.034390  |
| S | -1.657085 | -0.278502 | 0.124091  |
| O | -1.352678 | -0.817622 | -1.284068 |
| S | 1.922576  | 0.857843  | -0.232451 |

Cartesian coordinates of conformers for **5**:

**5a**

|   |           |           |           |
|---|-----------|-----------|-----------|
| C | -1.094093 | -0.364879 | -0.236041 |
| H | -0.982827 | -1.236802 | -0.876462 |
| C | -1.894029 | -0.547114 | 0.997434  |
| H | -2.289372 | -1.535333 | 1.216410  |
| H | -1.638805 | 0.049130  | 1.870605  |
| C | 0.073687  | 0.589731  | -0.264073 |
| H | 0.292221  | 0.928760  | -1.281939 |
| H | -0.098339 | 1.454486  | 0.384857  |
| C | 2.747970  | 1.141288  | 0.103273  |
| H | 2.463966  | 1.960710  | 0.769640  |
| H | 3.747679  | 0.783851  | 0.361332  |
| H | 2.715934  | 1.456106  | -0.943545 |
| S | 1.604669  | -0.261454 | 0.357538  |
| O | 1.967268  | -1.321577 | -0.695344 |
| S | -2.789033 | 0.373802  | -0.328894 |

**5b**

|   |           |           |           |
|---|-----------|-----------|-----------|
| C | -1.080941 | -0.080470 | 0.517551  |
| H | -1.048135 | -0.149281 | 1.603415  |
| C | -1.755625 | 1.114781  | -0.043454 |
| H | -2.128712 | 1.868410  | 0.645189  |
| H | -1.417427 | 1.498580  | -1.002976 |
| C | 0.073286  | -0.743071 | -0.195687 |
| H | 0.090838  | -1.819178 | 0.001266  |
| H | 0.048830  | -0.581952 | -1.278246 |
| C | 1.725552  | 1.522897  | -0.238724 |
| H | 0.957286  | 2.106227  | 0.276300  |
| H | 2.709957  | 1.945706  | -0.024094 |
| H | 1.549568  | 1.502624  | -1.317777 |
| S | 1.738162  | -0.180196 | 0.418981  |
| O | 2.757018  | -0.961956 | -0.426564 |
| S | -2.775160 | -0.417323 | -0.152024 |

**5c**

|   |           |           |           |
|---|-----------|-----------|-----------|
| C | -0.918570 | -0.348858 | 0.300232  |
| H | -0.731834 | -1.020018 | 1.134616  |
| C | -1.544165 | 0.950777  | 0.628523  |
| H | -1.726507 | 1.187340  | 1.673317  |
| H | -1.311402 | 1.804267  | -0.002000 |
| C | 0.036047  | -0.470974 | -0.858598 |
| H | 0.119983  | -1.501794 | -1.218490 |
| H | -0.275314 | 0.162284  | -1.694806 |
| C | 2.186639  | -1.078428 | 0.857861  |
| H | 2.076053  | -2.107623 | 0.504215  |
| H | 3.229640  | -0.889597 | 1.122512  |
| H | 1.544574  | -0.885793 | 1.720682  |
| S | 1.781122  | 0.077783  | -0.500810 |
| O | 1.707851  | 1.476999  | 0.129012  |
| S | -2.727853 | -0.257793 | -0.114206 |

**5d**

|   |           |           |           |
|---|-----------|-----------|-----------|
| C | -1.168091 | -0.594668 | -0.492980 |
| H | -1.149464 | -0.649034 | -1.580119 |
| C | -2.430533 | -1.028551 | 0.154584  |
| H | -3.226425 | -1.410189 | -0.479580 |
| H | -2.371412 | -1.485164 | 1.139927  |
| C | 0.151924  | -0.893801 | 0.173967  |
| H | 0.103719  | -0.767489 | 1.260652  |
| H | 0.453003  | -1.922156 | -0.063463 |
| C | 2.884987  | -0.706695 | 0.366909  |
| H | 2.975481  | -1.704310 | -0.072007 |
| H | 3.794843  | -0.133750 | 0.173771  |
| H | 2.696213  | -0.766203 | 1.442550  |
| S | 1.518452  | 0.189612  | -0.452223 |
| O | 1.402451  | 1.545813  | 0.258382  |
| S | -2.213782 | 0.798768  | 0.133244  |

**5e**

|   |           |           |           |
|---|-----------|-----------|-----------|
| C | 1.123600  | 0.195402  | 0.666657  |
| H | 1.000556  | 1.170741  | 1.131828  |
| C | 2.461268  | -0.426815 | 0.824256  |
| H | 3.203897  | 0.101000  | 1.416640  |
| H | 2.520201  | -1.511431 | 0.873526  |
| C | -0.106617 | -0.677667 | 0.656282  |
| H | 0.120568  | -1.678767 | 0.277565  |
| H | -0.536507 | -0.765479 | 1.661798  |
| C | -1.913847 | 1.437367  | 0.461766  |
| H | -1.095759 | 2.160492  | 0.400009  |
| H | -2.798266 | 1.847067  | -0.031930 |
| H | -2.142045 | 1.187071  | 1.501733  |
| S | -1.465548 | -0.079352 | -0.452999 |
| O | -2.622998 | -1.067678 | -0.233751 |
| S | 2.173355  | 0.258165  | -0.860434 |

**5f**

|   |           |           |           |
|---|-----------|-----------|-----------|
| C | 0.957261  | -0.627809 | 0.262528  |
| H | 0.643035  | -0.875663 | 1.274234  |
| C | 2.366715  | -0.936425 | -0.080358 |
| H | 2.984650  | -1.419321 | 0.672312  |
| H | 2.598859  | -1.209607 | -1.107284 |
| C | -0.112301 | -0.816501 | -0.784494 |
| H | 0.150090  | -0.360731 | -1.744650 |
| H | -0.277684 | -1.889185 | -0.945229 |
| C | -1.461317 | 1.586005  | -0.153321 |
| H | -1.084976 | 1.975684  | -1.103217 |
| H | -2.418904 | 2.054430  | 0.086451  |
| H | -0.746203 | 1.757859  | 0.653677  |
| S | -1.797738 | -0.201990 | -0.320821 |
| O | -2.074752 | -0.722267 | 1.100450  |
| S | 2.063176  | 0.859055  | 0.192319  |

**5g**

|   |           |           |           |
|---|-----------|-----------|-----------|
| C | -1.243214 | -0.783137 | 0.595150  |
| H | -1.772245 | -1.650971 | 0.986237  |
| C | -1.829846 | 0.532532  | 0.938132  |
| H | -2.708226 | 0.549194  | 1.578155  |
| H | -1.159945 | 1.382156  | 1.034356  |
| C | 0.249608  | -1.036702 | 0.517465  |
| H | 0.667104  | -1.077249 | 1.531517  |
| H | 0.442151  | -1.992016 | 0.017378  |
| C | 2.857024  | -0.551204 | -0.133209 |
| H | 2.886452  | -1.529114 | -0.622440 |
| H | 3.598533  | 0.110575  | -0.586854 |
| H | 3.039196  | -0.643424 | 0.941137  |
| S | 1.224512  | 0.222940  | -0.421248 |
| O | 1.211416  | 1.519141  | 0.406907  |
| S | -2.154873 | 0.010109  | -0.806250 |

**5h**

|   |           |           |           |
|---|-----------|-----------|-----------|
| C | 1.300177  | -0.640212 | 0.708000  |
| H | 1.871001  | -0.911129 | 1.594694  |
| C | 1.928790  | -0.978953 | -0.588234 |
| H | 2.878863  | -1.506549 | -0.575675 |
| H | 1.288078  | -1.211405 | -1.435497 |
| C | -0.193070 | -0.741941 | 0.945690  |
| H | -0.478338 | -1.798829 | 1.005512  |
| H | -0.481554 | -0.253491 | 1.881000  |
| C | -1.600941 | 1.571211  | 0.275804  |
| H | -0.655640 | 2.110414  | 0.371841  |
| H | -2.257616 | 2.088000  | -0.428063 |
| H | -2.094886 | 1.460059  | 1.245490  |
| S | -1.275927 | -0.087417 | -0.417124 |
| O | -2.598902 | -0.864222 | -0.284471 |
| S | 2.032900  | 0.817172  | -0.172319 |

Cartesian coordinates of reactant complex **3-R**:

|   |           |           |           |
|---|-----------|-----------|-----------|
| C | 1.977018  | -0.887604 | 0.538919  |
| H | 3.011809  | -0.560364 | 0.611169  |
| C | 1.697463  | -2.277937 | 0.966764  |
| H | 2.516710  | -2.868769 | 1.368267  |
| H | 0.720866  | -2.495860 | 1.392071  |
| C | 0.951221  | 0.190834  | 0.782345  |
| H | -0.077947 | -0.192164 | 0.737269  |
| H | 1.131696  | 0.654805  | 1.761247  |
| C | -0.126279 | 2.664594  | 0.278940  |
| H | 0.205656  | 2.927832  | 1.288110  |
| H | -0.159533 | 3.557843  | -0.350365 |
| H | -1.106169 | 2.169072  | 0.295434  |
| S | 1.088555  | 1.533036  | -0.474888 |
| O | 2.479932  | 2.172262  | -0.287021 |
| S | 1.708682  | -2.072464 | -0.866173 |
| C | -3.037655 | -0.237609 | 0.152566  |
| C | -4.082084 | -0.952328 | -0.723999 |
| H | -4.938373 | -0.306149 | -0.940517 |
| H | -3.616006 | -1.231066 | -1.678764 |
| H | -4.429167 | -1.876353 | -0.249061 |
| O | -3.060945 | 1.030003  | 0.174327  |
| O | -2.205666 | -0.970726 | 0.768806  |

Cartesian coordinates of reactant complex **5-R**:

|   |           |           |           |
|---|-----------|-----------|-----------|
| C | -2.016724 | -0.551828 | 0.404584  |
| H | -1.870196 | -0.551163 | 1.482303  |
| C | -3.420190 | -0.544709 | -0.068895 |
| H | -4.217849 | -0.494661 | 0.667630  |
| H | -3.640271 | -0.058618 | -1.016822 |
| C | -0.926683 | 0.134905  | -0.379297 |
| H | 0.065888  | -0.281396 | -0.158666 |
| H | -1.122814 | 0.084756  | -1.456014 |
| C | 0.554342  | 2.377351  | -0.980475 |
| H | 0.264844  | 2.278436  | -2.031741 |
| H | 0.784635  | 3.424014  | -0.764083 |
| H | 1.406511  | 1.728359  | -0.743225 |
| S | -0.882008 | 1.938884  | 0.059026  |
| O | -0.414508 | 2.025568  | 1.525115  |
| S | -2.605016 | -2.194676 | -0.222804 |
| C | 3.146386  | -0.773140 | -0.036036 |
| C | 4.420803  | -1.548749 | 0.347005  |
| H | 4.707422  | -1.278349 | 1.372501  |
| H | 4.253044  | -2.630482 | 0.323124  |
| H | 5.257471  | -1.289884 | -0.310205 |
| O | 3.300380  | 0.373400  | -0.554805 |
| O | 2.033641  | -1.324134 | 0.221483  |

Cartesian coordinates of transition states for **3**:

**3-TSa**

|   |           |           |           |
|---|-----------|-----------|-----------|
| C | 1.176441  | 1.301459  | 0.240870  |
| H | 1.339580  | 1.243983  | 1.315071  |
| C | 1.566593  | 2.565261  | -0.385907 |
| H | 2.287279  | 3.185184  | 0.146951  |
| H | 1.748419  | 2.533959  | -1.460200 |
| C | 0.916109  | 0.059847  | -0.457060 |
| H | -0.590462 | -0.188215 | -0.566551 |
| H | 1.220469  | 0.055664  | -1.511198 |
| C | -2.484363 | -0.584704 | 0.166889  |
| C | -3.935637 | -0.774270 | -0.235421 |
| H | -4.557164 | -0.955894 | 0.643837  |
| H | -4.297136 | 0.116091  | -0.761874 |
| H | -4.024697 | -1.619856 | -0.926799 |
| O | -2.111025 | -0.649172 | 1.342833  |
| C | 0.865501  | -2.658332 | -0.667303 |
| H | 1.190518  | -2.476677 | -1.696483 |
| H | 1.265083  | -3.610453 | -0.310870 |
| H | -0.224933 | -2.656745 | -0.601807 |
| S | 1.548692  | -1.354473 | 0.416157  |
| O | 3.089938  | -1.494407 | 0.247522  |
| O | -1.685117 | -0.353206 | -0.851982 |
| S | -0.194642 | 2.910202  | 0.074501  |

**3-TSb**

|   |           |           |           |
|---|-----------|-----------|-----------|
| C | 1.227010  | 1.112600  | 0.054606  |
| H | 1.585779  | 0.937755  | 1.066302  |
| C | 1.442786  | 2.456219  | -0.479586 |
| H | 2.291741  | 3.007604  | -0.073625 |
| H | 1.368855  | 2.552869  | -1.563414 |
| C | 0.785467  | -0.028112 | -0.688963 |
| H | -0.679283 | -0.251510 | -0.676441 |
| H | 0.899912  | 0.042218  | -1.777136 |
| C | -2.653899 | -0.624205 | 0.011635  |
| C | -4.070821 | -0.891779 | -0.469591 |
| H | -4.736238 | -1.080527 | 0.375506  |
| H | -4.438432 | -0.027077 | -1.034225 |
| H | -4.083592 | -1.752051 | -1.147731 |
| O | -2.369190 | -0.567959 | 1.213111  |
| C | 3.247894  | -1.402925 | -0.336428 |
| H | 3.583373  | -0.580640 | 0.302147  |
| H | 3.725224  | -2.338701 | -0.031590 |
| H | 3.470929  | -1.193890 | -1.386793 |
| S | 1.433434  | -1.620927 | -0.142320 |
| O | 1.230247  | -1.721327 | 1.387171  |
| O | -1.796726 | -0.458041 | -0.969559 |
| S | -0.144281 | 2.804162  | 0.414268  |



### 3-TSc

|   |           |           |           |
|---|-----------|-----------|-----------|
| C | -1.903989 | -0.269430 | -0.069428 |
| H | -2.298282 | 0.042905  | 0.893589  |
| C | -2.613193 | -1.390943 | -0.687111 |
| H | -3.679827 | -1.459733 | -0.468771 |
| H | -2.403891 | -1.546314 | -1.746508 |
| C | -0.892929 | 0.511970  | -0.710695 |
| H | 0.409769  | -0.084131 | -0.689278 |
| H | -1.015055 | 0.564536  | -1.799693 |
| C | 2.295579  | -0.798795 | 0.043562  |
| C | 3.630017  | -1.396902 | -0.375170 |
| H | 4.260197  | -1.582894 | 0.497279  |
| H | 3.469113  | -2.334626 | -0.918435 |
| H | 4.146108  | -0.710537 | -1.056373 |
| O | 2.044173  | -0.536569 | 1.228554  |
| C | -0.225148 | 1.916519  | 1.610073  |
| H | 0.611837  | 1.212878  | 1.628613  |
| H | 0.056503  | 2.887200  | 2.027018  |
| H | -1.080539 | 1.522327  | 2.166492  |
| S | -0.716079 | 2.232810  | -0.123486 |
| O | 0.535572  | 2.797350  | -0.829756 |
| O | 1.475195  | -0.595435 | -0.954243 |
| S | -1.575013 | -2.437116 | 0.438626  |

### 3-TSd

|   |           |           |           |
|---|-----------|-----------|-----------|
| C | 1.050159  | -1.161174 | 0.604898  |
| H | 0.939585  | -1.846935 | 1.441307  |
| C | 1.337149  | -1.789719 | -0.685845 |
| H | 1.063444  | -2.838700 | -0.795695 |
| H | 1.116365  | -1.204721 | -1.577611 |
| C | 0.472888  | 0.141690  | 0.830746  |
| H | -0.992760 | -0.162892 | 0.795029  |
| H | 0.602113  | 0.527327  | 1.848750  |
| C | -2.843321 | -0.514819 | -0.119477 |
| C | -4.278672 | -0.945511 | 0.125576  |
| H | -4.833991 | -0.986510 | -0.813834 |
| H | -4.296648 | -1.930930 | 0.604537  |
| H | -4.768135 | -0.242729 | 0.809257  |
| O | -2.417477 | -0.261391 | -1.253585 |
| C | -0.571637 | 2.531069  | 0.017889  |
| H | -0.609320 | 2.726315  | 1.093978  |
| H | -0.402391 | 3.462524  | -0.527822 |
| H | -1.490888 | 2.052235  | -0.326647 |
| S | 0.844525  | 1.438618  | -0.349644 |
| O | 2.081786  | 2.250475  | 0.123830  |
| O | -2.120195 | -0.435535 | 0.973594  |
| S | 3.050496  | -1.535655 | -0.021899 |

**3-TSe**

|   |           |           |           |
|---|-----------|-----------|-----------|
| C | -0.775232 | -1.160441 | -0.490971 |
| H | -0.476441 | -1.953362 | -1.173513 |
| C | -1.232200 | -1.606639 | 0.826450  |
| H | -0.858822 | -2.572089 | 1.168457  |
| H | -1.241499 | -0.846818 | 1.603735  |
| C | -0.299300 | 0.136045  | -0.877676 |
| H | 1.156182  | 0.024528  | -0.776701 |
| H | -0.333812 | 0.341814  | -1.953271 |
| C | 3.102172  | -0.229578 | 0.061547  |
| C | 4.577803  | -0.370036 | -0.278097 |
| H | 5.176059  | -0.467815 | 0.630497  |
| H | 4.728149  | -1.255844 | -0.906406 |
| H | 4.919519  | 0.497732  | -0.852646 |
| O | 2.690540  | -0.318967 | 1.225650  |
| C | -2.464955 | 1.938675  | -0.499345 |
| H | -3.062521 | 1.094153  | -0.149575 |
| H | -2.779173 | 2.873020  | -0.025574 |
| H | -2.528470 | 2.033967  | -1.587610 |
| S | -0.706735 | 1.679849  | -0.038110 |
| O | -0.715017 | 1.455350  | 1.493020  |
| O | 2.338742  | -0.018968 | -0.982974 |
| S | -2.834703 | -1.739646 | -0.106540 |

Cartesian coordinates of transition states for **5**:

**5-TSa**

|   |           |           |           |
|---|-----------|-----------|-----------|
| C | 1.302315  | 1.150800  | -0.207237 |
| H | 2.206316  | 1.097151  | 0.393129  |
| C | 1.061988  | 2.446228  | -0.848324 |
| H | 1.918428  | 3.105797  | -0.985111 |
| H | 0.386397  | 2.442536  | -1.703542 |
| C | 0.670064  | -0.087354 | -0.613799 |
| H | -0.706390 | -0.344030 | 0.017868  |
| H | 0.346654  | -0.098088 | -1.658941 |
| C | -2.746074 | -0.525697 | -0.241072 |
| C | -4.036300 | -0.918279 | 0.455379  |
| H | -4.213274 | -0.257316 | 1.311409  |
| H | -4.879853 | -0.853262 | -0.234937 |
| H | -3.957623 | -1.939869 | 0.843630  |
| O | -1.687079 | -0.608382 | 0.536728  |
| C | 1.532572  | -1.585607 | 1.545713  |
| H | 0.497251  | -1.616207 | 1.894115  |
| H | 2.070248  | -2.477781 | 1.875550  |
| H | 2.038692  | -0.690684 | 1.919305  |
| S | 1.554465  | -1.595776 | -0.284736 |
| O | 3.069022  | -1.498990 | -0.638250 |
| O | -2.717305 | -0.165643 | -1.422342 |
| S | 0.212327  | 2.654234  | 0.783141  |

**5-TSb**

|   |           |           |           |
|---|-----------|-----------|-----------|
| C | -1.134147 | 1.380086  | -0.174057 |
| H | -1.682493 | 1.484294  | -1.107815 |
| C | -1.068189 | 2.584239  | 0.653997  |
| H | -1.868028 | 3.313590  | 0.523859  |
| H | -0.815104 | 2.426384  | 1.702736  |
| C | -0.778986 | 0.049753  | 0.248910  |
| H | 0.567377  | -0.296858 | -0.201027 |
| H | -0.699644 | -0.090327 | 1.332339  |
| C | 2.560393  | -0.787221 | 0.262296  |
| C | 3.892728  | -1.222270 | -0.327485 |
| H | 4.239553  | -0.483983 | -1.059059 |
| H | 4.642877  | -1.338627 | 0.457754  |
| H | 3.770919  | -2.173557 | -0.858182 |
| O | 1.629035  | -0.591596 | -0.637208 |
| C | -3.224903 | -1.258773 | 0.635040  |
| H | -3.732324 | -0.289822 | 0.617039  |
| H | -3.904239 | -2.046092 | 0.296803  |
| H | -2.854927 | -1.482181 | 1.640548  |
| S | -1.801904 | -1.208940 | -0.520454 |
| O | -1.118829 | -2.583248 | -0.329683 |
| O | 2.402257  | -0.644167 | 1.482368  |
| S | 0.399089  | 2.899839  | -0.433360 |

**5-TSc**

|   |           |           |           |
|---|-----------|-----------|-----------|
| C | -1.515322 | 1.132410  | 0.204408  |
| H | -2.253167 | 1.096757  | -0.593969 |
| C | -1.370960 | 2.422098  | 0.877368  |
| H | -2.282391 | 3.017290  | 0.952710  |
| H | -0.828613 | 2.392755  | 1.823647  |
| C | -0.868364 | -0.079625 | 0.583637  |
| H | 0.387773  | -0.222795 | -0.044671 |
| H | -0.587214 | -0.139986 | 1.640362  |
| C | 2.510187  | -0.279821 | 0.112762  |
| C | 3.811961  | -0.528787 | -0.633933 |
| H | 3.929793  | 0.220201  | -1.425923 |
| H | 4.664588  | -0.469367 | 0.046250  |
| H | 3.792203  | -1.511910 | -1.116547 |
| O | 1.440811  | -0.448877 | -0.621763 |
| C | -0.568531 | -2.826400 | 0.563145  |
| H | -0.375984 | -2.760135 | 1.638215  |
| H | -1.003742 | -3.800466 | 0.326094  |
| H | 0.346235  | -2.658281 | -0.009341 |
| S | -1.815019 | -1.569660 | 0.102287  |
| O | -1.905764 | -1.575514 | -1.437466 |
| O | 2.499493  | 0.057310  | 1.305512  |
| S | -0.313709 | 2.915494  | -0.568001 |

**5-TSd**

|   |           |           |           |
|---|-----------|-----------|-----------|
| C | -0.655973 | -1.090826 | 0.115613  |
| H | 0.076500  | -1.892323 | 0.052249  |
| C | -1.592701 | -1.195895 | 1.240186  |
| H | -1.289336 | -1.799784 | 2.094616  |
| H | -2.143260 | -0.301941 | 1.519170  |
| C | -0.271092 | 0.087953  | -0.636771 |
| H | 1.160746  | 0.349694  | -0.167820 |
| H | -0.042640 | -0.117302 | -1.686490 |
| C | 3.104345  | -0.346243 | -0.117988 |
| C | 4.529119  | 0.001689  | 0.272381  |
| H | 4.582924  | 0.209937  | 1.346844  |
| H | 5.206406  | -0.818470 | 0.025262  |
| H | 4.848368  | 0.909886  | -0.251175 |
| O | 2.234077  | 0.600096  | 0.164350  |
| C | -0.662434 | 2.230749  | 1.117030  |
| H | 0.424779  | 2.307412  | 1.194199  |
| H | -1.118739 | 3.216009  | 1.242461  |
| H | -1.051864 | 1.544018  | 1.871720  |
| S | -1.099411 | 1.666658  | -0.572795 |
| O | -2.654934 | 1.593503  | -0.561466 |
| O | 2.809918  | -1.422599 | -0.649293 |
| S | -2.430212 | -2.160389 | -0.102985 |

**5-TSe**

|   |           |           |           |
|---|-----------|-----------|-----------|
| C | 0.768551  | -1.242588 | 0.180664  |
| H | 0.332458  | -1.996791 | 0.831226  |
| C | 1.421570  | -1.757185 | -1.024226 |
| H | 1.116218  | -2.748040 | -1.359362 |
| H | 1.555703  | -1.059428 | -1.849643 |
| C | 0.276867  | 0.090752  | 0.412032  |
| H | -1.090650 | 0.014809  | -0.124699 |
| H | 0.097680  | 0.336342  | 1.463187  |
| C | -3.137677 | -0.342770 | 0.226242  |
| C | -4.511326 | -0.413025 | -0.421034 |
| H | -4.509081 | -1.156770 | -1.225808 |
| H | -5.273190 | -0.675924 | 0.316015  |
| H | -4.759759 | 0.553923  | -0.873183 |
| O | -2.173824 | -0.050885 | -0.612608 |
| C | 2.236426  | 1.990182  | 0.902633  |
| H | 2.897714  | 1.158604  | 1.160394  |
| H | 2.816602  | 2.837036  | 0.526128  |
| H | 1.633477  | 2.295588  | 1.763553  |
| S | 1.112379  | 1.440282  | -0.431483 |
| O | 0.099524  | 2.603045  | -0.589990 |
| O | -2.975988 | -0.546755 | 1.437407  |
| S | 2.841288  | -1.787456 | 0.171224  |

**5-TSf**

|   |           |           |           |
|---|-----------|-----------|-----------|
| C | -1.001579 | -1.181585 | -0.197097 |
| H | -0.620629 | -2.071182 | -0.692979 |
| C | -1.821889 | -1.423073 | 0.991114  |
| H | -1.661727 | -2.370774 | 1.505577  |
| H | -1.931119 | -0.586830 | 1.679121  |
| C | -0.350173 | 0.035033  | -0.582610 |
| H | 0.986171  | -0.041027 | 0.035907  |
| H | -0.100815 | 0.088703  | -1.646737 |
| C | 2.982805  | -0.680590 | -0.073949 |
| C | 4.333613  | -0.654171 | 0.621629  |
| H | 4.243049  | -1.073915 | 1.629851  |
| H | 5.070563  | -1.226128 | 0.053642  |
| H | 4.678506  | 0.380312  | 0.730441  |
| O | 2.049200  | -0.010444 | 0.559499  |
| C | 0.129707  | 2.704869  | -0.864581 |
| H | 0.111548  | 2.574494  | -1.950470 |
| H | -0.157585 | 3.728245  | -0.611318 |
| H | 1.117691  | 2.471968  | -0.459385 |
| S | -1.120035 | 1.604715  | -0.102683 |
| O | -0.973340 | 1.779647  | 1.427220  |
| O | 2.808332  | -1.287464 | -1.139011 |
| S | -3.157721 | -1.512882 | -0.298714 |

Active site coordinates (QM region) for MMP2 complex with **4 (8)**:

**8-R**

|    |           |           |           |
|----|-----------|-----------|-----------|
| C  | 51.804911 | 38.188371 | 51.607687 |
| N  | 52.406267 | 37.942271 | 52.822335 |
| H  | 53.411591 | 37.935590 | 53.016483 |
| C  | 51.435283 | 37.734446 | 53.742225 |
| H  | 51.645828 | 37.532502 | 54.781058 |
| N  | 50.233092 | 37.840742 | 53.185666 |
| C  | 50.464661 | 38.140656 | 51.853088 |
| H  | 49.626952 | 38.307731 | 51.201306 |
| C  | 47.372907 | 38.461723 | 49.595440 |
| H  | 48.244221 | 39.111149 | 49.713999 |
| H  | 46.544331 | 39.070787 | 49.218752 |
| C  | 46.925389 | 37.846219 | 50.935790 |
| O  | 47.693271 | 38.127193 | 51.959900 |
| O  | 45.906322 | 37.153835 | 50.988343 |
| C  | 47.294256 | 33.486001 | 52.371128 |
| N  | 47.475333 | 33.213991 | 53.711684 |
| H  | 47.186822 | 32.392978 | 54.257947 |
| C  | 47.751618 | 34.383253 | 54.335913 |
| H  | 47.911487 | 34.456795 | 55.399928 |
| N  | 47.808241 | 35.378717 | 53.461496 |
| C  | 47.520763 | 34.820912 | 52.225758 |
| H  | 47.373364 | 35.431506 | 51.355861 |
| C  | 49.574024 | 35.956494 | 57.687029 |
| N  | 48.511028 | 36.745406 | 58.074957 |
| H  | 48.088672 | 36.845403 | 59.003839 |
| C  | 48.025310 | 37.367009 | 56.974122 |
| H  | 47.157995 | 38.007172 | 57.008208 |
| N  | 48.728360 | 37.044983 | 55.894715 |
| C  | 49.711055 | 36.169146 | 56.339855 |
| H  | 50.424044 | 35.750964 | 55.646507 |
| Zn | 48.211701 | 37.386181 | 53.735241 |
| C  | 45.020001 | 39.206423 | 53.520584 |
| H  | 45.250927 | 38.612266 | 52.640760 |
| H  | 43.990877 | 39.146497 | 53.863354 |
| S  | 46.264209 | 39.055766 | 54.874006 |
| C  | 45.748121 | 40.466092 | 53.789209 |
| H  | 45.176375 | 41.202162 | 54.350166 |
| C  | 46.758409 | 41.079151 | 52.852175 |
| H  | 47.456623 | 40.334777 | 52.461466 |
| H  | 46.265064 | 41.597251 | 52.022107 |
| S  | 47.619812 | 42.397529 | 53.821999 |
| O  | 46.801585 | 43.665443 | 53.686602 |
| O  | 45.395947 | 36.308944 | 55.794994 |
| H  | 45.120822 | 35.794249 | 55.000688 |
| H  | 45.691593 | 35.595734 | 56.412486 |

**8-TS**

|    |           |           |           |
|----|-----------|-----------|-----------|
| C  | 51.712006 | 38.147972 | 51.588778 |
| N  | 52.386824 | 37.868173 | 52.756422 |
| H  | 53.400055 | 37.850814 | 52.894696 |
| C  | 51.483275 | 37.672597 | 53.737130 |
| H  | 51.751989 | 37.445643 | 54.757765 |
| N  | 50.251294 | 37.818617 | 53.256178 |
| C  | 50.384693 | 38.128078 | 51.909393 |
| H  | 49.514209 | 38.397814 | 51.316045 |
| C  | 47.666089 | 38.818959 | 48.471536 |
| H  | 48.625993 | 39.336788 | 48.411589 |
| H  | 46.940545 | 39.403203 | 47.895982 |
| C  | 47.177270 | 38.757549 | 49.925037 |
| O  | 46.135588 | 38.165554 | 50.219659 |
| O  | 47.970309 | 39.376783 | 50.773434 |
| C  | 47.629758 | 33.541326 | 52.345692 |
| N  | 47.368423 | 33.324575 | 53.680005 |
| H  | 46.891654 | 32.553067 | 54.163862 |
| C  | 47.779254 | 34.404501 | 54.370495 |
| H  | 47.650129 | 34.498080 | 55.438295 |
| N  | 48.315541 | 35.301584 | 53.555405 |
| C  | 48.236929 | 34.764332 | 52.280831 |
| H  | 48.622115 | 35.298003 | 51.424611 |
| C  | 49.677154 | 35.867809 | 57.940527 |
| N  | 48.621560 | 36.676726 | 58.305036 |
| H  | 48.166211 | 36.781243 | 59.218366 |
| C  | 48.171601 | 37.314357 | 57.200286 |
| H  | 47.298112 | 37.950125 | 57.208917 |
| N  | 48.905718 | 36.973371 | 56.142327 |
| C  | 49.852526 | 36.075350 | 56.601207 |
| H  | 50.566763 | 35.637918 | 55.920995 |
| Zn | 48.533246 | 37.243703 | 54.119361 |
| C  | 45.310194 | 38.866745 | 53.141718 |
| H  | 45.501889 | 38.487487 | 52.132534 |
| H  | 44.284048 | 38.729868 | 53.480196 |
| S  | 46.431918 | 38.141681 | 54.444675 |
| C  | 45.906649 | 40.167980 | 53.454875 |
| H  | 45.669283 | 40.574746 | 54.434652 |
| C  | 46.752983 | 40.890905 | 52.573644 |
| H  | 47.466385 | 40.082249 | 51.784081 |
| H  | 46.214745 | 41.232911 | 51.677563 |
| S  | 47.479092 | 42.279386 | 53.513451 |
| O  | 46.671016 | 43.547445 | 53.338171 |
| O  | 45.076304 | 37.119081 | 57.253721 |
| H  | 45.342653 | 37.248321 | 56.319702 |
| H  | 45.428189 | 36.215109 | 57.439462 |

**8-P1**

|    |           |           |           |
|----|-----------|-----------|-----------|
| C  | 51.801927 | 38.165706 | 51.237357 |
| N  | 52.471943 | 37.997566 | 52.428425 |
| H  | 53.482692 | 38.014907 | 52.591970 |
| C  | 51.560842 | 37.811025 | 53.405392 |
| H  | 51.830128 | 37.662214 | 54.439897 |
| N  | 50.331996 | 37.855457 | 52.904116 |
| C  | 50.471783 | 38.092193 | 51.545519 |
| H  | 49.604933 | 38.228039 | 50.911098 |
| C  | 47.641088 | 38.763679 | 47.755259 |
| H  | 48.568962 | 39.328056 | 47.861078 |
| H  | 46.985241 | 39.284659 | 47.052204 |
| C  | 46.919971 | 38.628214 | 49.077902 |
| O  | 47.720815 | 38.937421 | 50.134766 |
| O  | 45.785006 | 38.240794 | 49.219741 |
| C  | 47.805204 | 33.474903 | 52.185257 |
| N  | 47.608492 | 33.253409 | 53.529838 |
| H  | 47.077857 | 32.524816 | 54.024121 |
| C  | 48.152404 | 34.285400 | 54.205903 |
| H  | 48.096294 | 34.375393 | 55.280669 |
| N  | 48.713295 | 35.148174 | 53.371113 |
| C  | 48.507284 | 34.642485 | 52.100001 |
| H  | 48.882375 | 35.156435 | 51.224033 |
| C  | 49.654866 | 35.959619 | 57.597170 |
| N  | 48.454550 | 36.586792 | 57.838630 |
| H  | 47.790462 | 36.541739 | 58.620612 |
| C  | 48.071623 | 37.201737 | 56.701105 |
| H  | 47.124469 | 37.715247 | 56.598092 |
| N  | 48.973696 | 37.032961 | 55.744138 |
| C  | 49.979057 | 36.262693 | 56.301559 |
| H  | 50.837529 | 35.976973 | 55.714966 |
| Zn | 48.611091 | 37.182648 | 53.751331 |
| C  | 45.624442 | 38.870201 | 53.670292 |
| H  | 44.865369 | 39.181878 | 52.951450 |
| H  | 45.102195 | 38.501194 | 54.559221 |
| S  | 46.510775 | 37.434688 | 52.875785 |
| C  | 46.487170 | 40.033240 | 54.043900 |
| H  | 46.911215 | 40.027644 | 55.050808 |
| C  | 46.751735 | 41.080881 | 53.256279 |
| H  | 47.208119 | 38.757834 | 50.960088 |
| H  | 46.353668 | 41.202888 | 52.251045 |
| S  | 47.600662 | 42.487722 | 53.975820 |
| O  | 46.776676 | 43.725706 | 53.700004 |
| O  | 45.959838 | 36.613248 | 59.131959 |
| H  | 45.556387 | 37.334127 | 58.569974 |
| H  | 45.822256 | 35.858140 | 58.486499 |



**8-P2**

|    |           |           |           |
|----|-----------|-----------|-----------|
| C  | 51.875388 | 38.049114 | 51.378631 |
| N  | 52.631548 | 37.981497 | 52.524964 |
| H  | 53.643934 | 38.088164 | 52.631176 |
| C  | 51.808755 | 37.756521 | 53.570348 |
| H  | 52.156010 | 37.668120 | 54.588748 |
| N  | 50.553468 | 37.686504 | 53.154284 |
| C  | 50.581788 | 37.881825 | 51.782410 |
| H  | 49.666633 | 37.949654 | 51.209622 |
| C  | 47.434177 | 38.592163 | 48.373754 |
| H  | 48.322622 | 39.227398 | 48.379747 |
| H  | 46.637840 | 39.109043 | 47.831137 |
| C  | 46.956184 | 38.310323 | 49.789403 |
| O  | 47.812060 | 38.791558 | 50.713356 |
| O  | 45.951343 | 37.693048 | 50.076111 |
| C  | 47.727135 | 33.516824 | 52.306419 |
| N  | 47.423534 | 33.313957 | 53.633806 |
| H  | 46.915321 | 32.556998 | 54.107451 |
| C  | 47.887580 | 34.365332 | 54.337737 |
| H  | 47.753352 | 34.462880 | 55.404844 |
| N  | 48.494125 | 35.227798 | 53.534842 |
| C  | 48.403628 | 34.702404 | 52.257829 |
| H  | 48.830359 | 35.220315 | 51.410199 |
| C  | 49.712495 | 35.910581 | 57.880515 |
| N  | 48.553764 | 36.602626 | 58.159333 |
| H  | 48.034195 | 36.676188 | 59.039671 |
| C  | 48.136978 | 37.205184 | 57.020036 |
| H  | 47.218631 | 37.764407 | 56.933567 |
| N  | 48.991779 | 36.957658 | 56.032530 |
| C  | 49.981279 | 36.155132 | 56.563079 |
| H  | 50.794795 | 35.814994 | 55.942065 |
| Zn | 48.792221 | 37.176949 | 54.023122 |
| C  | 44.522800 | 39.506278 | 53.757837 |
| H  | 44.708432 | 39.098127 | 52.763012 |
| H  | 43.507331 | 39.916517 | 53.781057 |
| S  | 44.541259 | 38.081580 | 54.940291 |
| C  | 45.505211 | 40.574473 | 54.124236 |
| H  | 45.450053 | 40.933795 | 55.151202 |
| C  | 46.420662 | 41.124687 | 53.312993 |
| H  | 47.506420 | 38.553305 | 51.652125 |
| H  | 46.528258 | 40.882951 | 52.257770 |
| S  | 47.384972 | 42.467621 | 54.033503 |
| O  | 46.707015 | 43.792835 | 53.775915 |
| O  | 47.402629 | 38.143709 | 53.247267 |
| H  | 47.276281 | 39.021716 | 53.642509 |
| H  | 45.663029 | 37.556669 | 54.383786 |

Active site coordinates (QM region) for MMP2 complex with **6 (9)**:

**9-R**

|    |           |           |           |
|----|-----------|-----------|-----------|
| C  | 51.810650 | 38.274404 | 51.618934 |
| N  | 52.426849 | 38.007949 | 52.821498 |
| H  | 53.434347 | 37.992909 | 53.002975 |
| C  | 51.468242 | 37.788863 | 53.750992 |
| H  | 51.692716 | 37.573237 | 54.784029 |
| N  | 50.259790 | 37.906931 | 53.212227 |
| C  | 50.472586 | 38.228507 | 51.882128 |
| H  | 49.624222 | 38.410498 | 51.247276 |
| C  | 47.347648 | 38.519059 | 49.700112 |
| H  | 48.214379 | 39.175711 | 49.812033 |
| H  | 46.513041 | 39.121805 | 49.326059 |
| C  | 46.907911 | 37.905774 | 51.046891 |
| O  | 47.675846 | 38.210237 | 52.065821 |
| O  | 45.901468 | 37.196613 | 51.099132 |
| C  | 47.287005 | 33.503394 | 52.394966 |
| N  | 47.488684 | 33.235809 | 53.733848 |
| H  | 47.193007 | 32.421625 | 54.286312 |
| C  | 47.784188 | 34.406417 | 54.346824 |
| H  | 47.958250 | 34.483381 | 55.408374 |
| N  | 47.833163 | 35.398737 | 53.468715 |
| C  | 47.521170 | 34.836429 | 52.240288 |
| H  | 47.361690 | 35.441642 | 51.368390 |
| C  | 49.570833 | 35.996501 | 57.664511 |
| N  | 48.502635 | 36.777934 | 58.054513 |
| H  | 48.077886 | 36.870247 | 58.983557 |
| C  | 48.008988 | 37.398518 | 56.957824 |
| H  | 47.143310 | 38.040500 | 56.992365 |
| N  | 48.716071 | 37.085650 | 55.877806 |
| C  | 49.707274 | 36.215611 | 56.318755 |
| H  | 50.423013 | 35.804319 | 55.624102 |
| Zn | 48.252975 | 37.416905 | 53.769650 |
| C  | 44.971359 | 39.436438 | 53.695634 |
| H  | 45.220629 | 38.938438 | 52.764221 |
| H  | 43.941962 | 39.309483 | 54.019664 |
| S  | 46.227617 | 39.264158 | 55.015261 |
| C  | 45.648110 | 40.714196 | 54.046789 |
| H  | 45.057347 | 41.386609 | 54.664689 |
| C  | 46.609043 | 41.400133 | 53.112606 |
| H  | 47.285010 | 40.679591 | 52.646993 |
| H  | 46.071933 | 41.954454 | 52.332236 |
| S  | 47.513936 | 42.721383 | 54.086793 |
| O  | 47.895175 | 42.185108 | 55.453406 |
| O  | 45.430475 | 36.381008 | 55.736194 |
| H  | 45.143805 | 35.865847 | 54.945347 |
| H  | 45.731267 | 35.666918 | 56.349349 |

**9-TS**

|    |           |           |           |
|----|-----------|-----------|-----------|
| C  | 51.845515 | 38.253766 | 51.550521 |
| N  | 52.513320 | 37.965822 | 52.721564 |
| H  | 53.525829 | 37.935635 | 52.865537 |
| C  | 51.602177 | 37.775399 | 53.696637 |
| H  | 51.863770 | 37.543843 | 54.717996 |
| N  | 50.373437 | 37.932289 | 53.209684 |
| C  | 50.516090 | 38.245318 | 51.864539 |
| H  | 49.646538 | 38.516585 | 51.268370 |
| C  | 47.783039 | 38.949634 | 48.490395 |
| H  | 48.761468 | 39.433645 | 48.453963 |
| H  | 47.095719 | 39.542683 | 47.877913 |
| C  | 47.238501 | 38.935295 | 49.930696 |
| O  | 46.110959 | 38.480891 | 50.157448 |
| O  | 48.058610 | 39.429496 | 50.821334 |
| C  | 47.717107 | 33.583446 | 52.370785 |
| N  | 47.471590 | 33.394163 | 53.712456 |
| H  | 46.963298 | 32.649348 | 54.206106 |
| C  | 47.944430 | 34.462861 | 54.381545 |
| H  | 47.838248 | 34.573826 | 55.450101 |
| N  | 48.507361 | 35.326277 | 53.546941 |
| C  | 48.378822 | 34.776829 | 52.281145 |
| H  | 48.771147 | 35.282017 | 51.409975 |
| C  | 49.725208 | 35.934611 | 57.886582 |
| N  | 48.651337 | 36.731043 | 58.227215 |
| H  | 48.168253 | 36.818056 | 59.127898 |
| C  | 48.231309 | 37.378842 | 57.115835 |
| H  | 47.356346 | 38.011819 | 57.101322 |
| N  | 49.002565 | 37.057633 | 56.079170 |
| C  | 49.941619 | 36.162316 | 56.556579 |
| H  | 50.679862 | 35.738055 | 55.893613 |
| Zn | 48.663504 | 37.317299 | 54.051875 |
| C  | 45.418205 | 38.992454 | 53.154023 |
| H  | 45.517032 | 38.740257 | 52.092008 |
| H  | 44.390882 | 38.913293 | 53.517659 |
| S  | 46.436195 | 37.896410 | 54.253531 |
| C  | 46.096348 | 40.227289 | 53.545548 |
| H  | 46.093096 | 40.509015 | 54.596515 |
| C  | 46.816431 | 41.024594 | 52.622258 |
| H  | 47.545100 | 40.320365 | 51.913215 |
| H  | 46.176854 | 41.320661 | 51.776846 |
| S  | 47.490120 | 42.527987 | 53.474417 |
| O  | 47.760322 | 42.166282 | 54.927748 |
| O  | 45.139684 | 37.190813 | 57.207925 |
| H  | 45.396294 | 37.319466 | 56.270399 |
| H  | 45.498411 | 36.288451 | 57.391333 |

**9-P1**

|    |           |           |           |
|----|-----------|-----------|-----------|
| C  | 51.804238 | 38.301332 | 51.250614 |
| N  | 52.462767 | 38.159829 | 52.451590 |
| H  | 53.472290 | 38.180247 | 52.624548 |
| C  | 51.542134 | 37.963924 | 53.418403 |
| H  | 51.802292 | 37.826053 | 54.456536 |
| N  | 50.318227 | 37.980122 | 52.902882 |
| C  | 50.471124 | 38.201637 | 51.543130 |
| H  | 49.608957 | 38.299102 | 50.896126 |
| C  | 47.637138 | 38.806314 | 47.788354 |
| H  | 48.558845 | 39.378633 | 47.902209 |
| H  | 46.982946 | 39.323358 | 47.080543 |
| C  | 46.906306 | 38.664803 | 49.105936 |
| O  | 47.680686 | 39.018737 | 50.167014 |
| O  | 45.782040 | 38.242515 | 49.237622 |
| C  | 47.785701 | 33.547105 | 52.182368 |
| N  | 47.592673 | 33.343305 | 53.530163 |
| H  | 47.079472 | 32.608703 | 54.035773 |
| C  | 48.114364 | 34.397373 | 54.190101 |
| H  | 48.057834 | 34.499466 | 55.263776 |
| N  | 48.655311 | 35.260446 | 53.342497 |
| C  | 48.459705 | 34.730525 | 52.079426 |
| H  | 48.825987 | 35.237088 | 51.195576 |
| C  | 49.659723 | 35.990069 | 57.578262 |
| N  | 48.480335 | 36.653215 | 57.833079 |
| H  | 47.818226 | 36.610129 | 58.616840 |
| C  | 48.107945 | 37.287074 | 56.702942 |
| H  | 47.184741 | 37.842513 | 56.610505 |
| N  | 48.997101 | 37.095968 | 55.738048 |
| C  | 49.982688 | 36.291416 | 56.281683 |
| H  | 50.828084 | 35.983149 | 55.687015 |
| Zn | 48.596794 | 37.300197 | 53.761042 |
| C  | 45.523780 | 38.946635 | 53.772158 |
| H  | 44.770720 | 39.273172 | 53.052289 |
| H  | 44.995472 | 38.498172 | 54.620160 |
| S  | 46.479618 | 37.588296 | 52.915926 |
| C  | 46.334557 | 40.113087 | 54.238416 |
| H  | 46.821328 | 40.050292 | 55.213583 |
| C  | 46.488706 | 41.247056 | 53.554880 |
| H  | 47.156942 | 38.841064 | 50.988379 |
| H  | 46.047175 | 41.452026 | 52.582086 |
| S  | 47.353300 | 42.632233 | 54.312643 |
| O  | 47.874652 | 42.192528 | 55.667969 |
| O  | 45.987772 | 36.637224 | 59.133343 |
| H  | 45.576149 | 37.356679 | 58.573920 |
| H  | 45.861838 | 35.886063 | 58.480424 |

**9-P2**

|    |           |           |           |
|----|-----------|-----------|-----------|
| C  | 51.832330 | 38.171991 | 51.395802 |
| N  | 52.591147 | 38.148399 | 52.543125 |
| H  | 53.602577 | 38.267565 | 52.644213 |
| C  | 51.774555 | 37.897334 | 53.588840 |
| H  | 52.125072 | 37.828445 | 54.607497 |
| N  | 50.524357 | 37.772618 | 53.173257 |
| C  | 50.546587 | 37.951143 | 51.800025 |
| H  | 49.632347 | 37.959966 | 51.223685 |
| C  | 47.365865 | 38.569628 | 48.294039 |
| H  | 48.228176 | 39.237324 | 48.234407 |
| H  | 46.529352 | 39.026376 | 47.757351 |
| C  | 46.957658 | 38.346379 | 49.743518 |
| O  | 47.822420 | 38.912731 | 50.593921 |
| O  | 45.987401 | 37.698430 | 50.095605 |
| C  | 47.785567 | 33.561860 | 52.353655 |
| N  | 47.490460 | 33.345044 | 53.681693 |
| H  | 46.984345 | 32.581447 | 54.146367 |
| C  | 47.937542 | 34.402641 | 54.390560 |
| H  | 47.811452 | 34.490599 | 55.459274 |
| N  | 48.523335 | 35.282780 | 53.592632 |
| C  | 48.433857 | 34.764197 | 52.312724 |
| H  | 48.845406 | 35.294824 | 51.465673 |
| C  | 49.630901 | 35.969529 | 57.869827 |
| N  | 48.538732 | 36.750070 | 58.190376 |
| H  | 48.039991 | 36.832004 | 59.080678 |
| C  | 48.129832 | 37.383810 | 57.064085 |
| H  | 47.267442 | 38.033877 | 57.024006 |
| N  | 48.920996 | 37.071783 | 56.046448 |
| C  | 49.869027 | 36.197565 | 56.543533 |
| H  | 50.631289 | 35.797778 | 55.893373 |
| Zn | 48.747515 | 37.291978 | 54.030239 |
| C  | 44.070476 | 40.177263 | 54.423010 |
| H  | 43.371423 | 40.812382 | 53.874398 |
| H  | 43.574635 | 39.857449 | 55.342795 |
| S  | 44.304129 | 38.622700 | 53.430886 |
| C  | 45.338809 | 40.915681 | 54.757212 |
| H  | 45.752750 | 40.761930 | 55.754113 |
| C  | 45.974900 | 41.769415 | 53.951840 |
| H  | 47.560920 | 38.713718 | 51.567407 |
| H  | 45.681143 | 41.991765 | 52.928963 |
| S  | 47.230355 | 42.842550 | 54.663076 |
| O  | 47.732319 | 42.229853 | 55.958512 |
| O  | 47.519177 | 38.261074 | 53.063368 |
| H  | 46.654241 | 38.440618 | 53.467751 |
| H  | 44.610485 | 39.297996 | 52.290455 |
